# Supplementary material
Source: PubMed Central journal article supplement (PMC3123920)
Supplement: mmc1.pdf [file mmc1.pdf]

Supplementary Materials

**Transmembrane Helix Orientation and Dynamics: Insights from Ensemble Dynamics with Solid-State NMR Observables**

Sunhwan Jo and Wonpil Im\*

Department of Molecular Biosciences and Center for Bioinformatics, The University of Kansas, 2030 Becker Drive, Lawrence, KS 66047, USA

---

\* Corresponding author: Phone: (785) 864-1993; Fax: (785) 864-5558; E-mail: [wonpil@ku.edu](mailto:wonpil@ku.edu)

**Table S1.** System parameters for each standard molecular dynamics simulation system

| System    | Number of |    |       |                                 | Total Atoms | Initial Size (Å)   |
|-----------|-----------|----|-------|---------------------------------|-------------|--------------------|
|           | PC        | PG | Water | K <sup>+</sup> /Cl <sup>-</sup> |             |                    |
| DOPC/DOPG | 126       | 14 | 6,823 | 25 / 11                         | 40,218      | 69.8 × 69.8 × 79.6 |
| DMPC/DMPG | 126       | 14 | 6,798 | 23 / 9                          | 37,340      | 66.4 × 66.4 × 79.6 |
| DLPC/DLPG | 126       | 14 | 7,017 | 22 / 8                          | 36,316      | 64.5 × 64.5 × 79.6 |

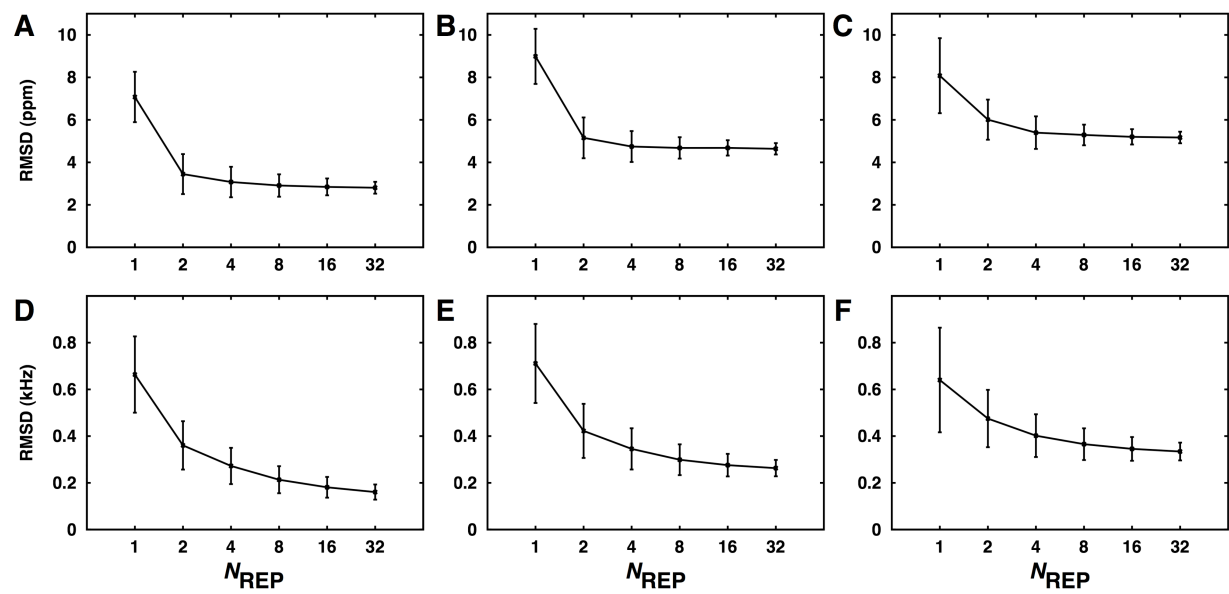

**Figure S1.** CSA and DC RMSD of structure ensemble determined by SSNMR-ED. (A, B, and C) CSA RMSD in DOPC, DMPC, and DLPC, respectively. (D, E, and F) DC RMSD in DOPC, DMPC, and DLPC, respectively.

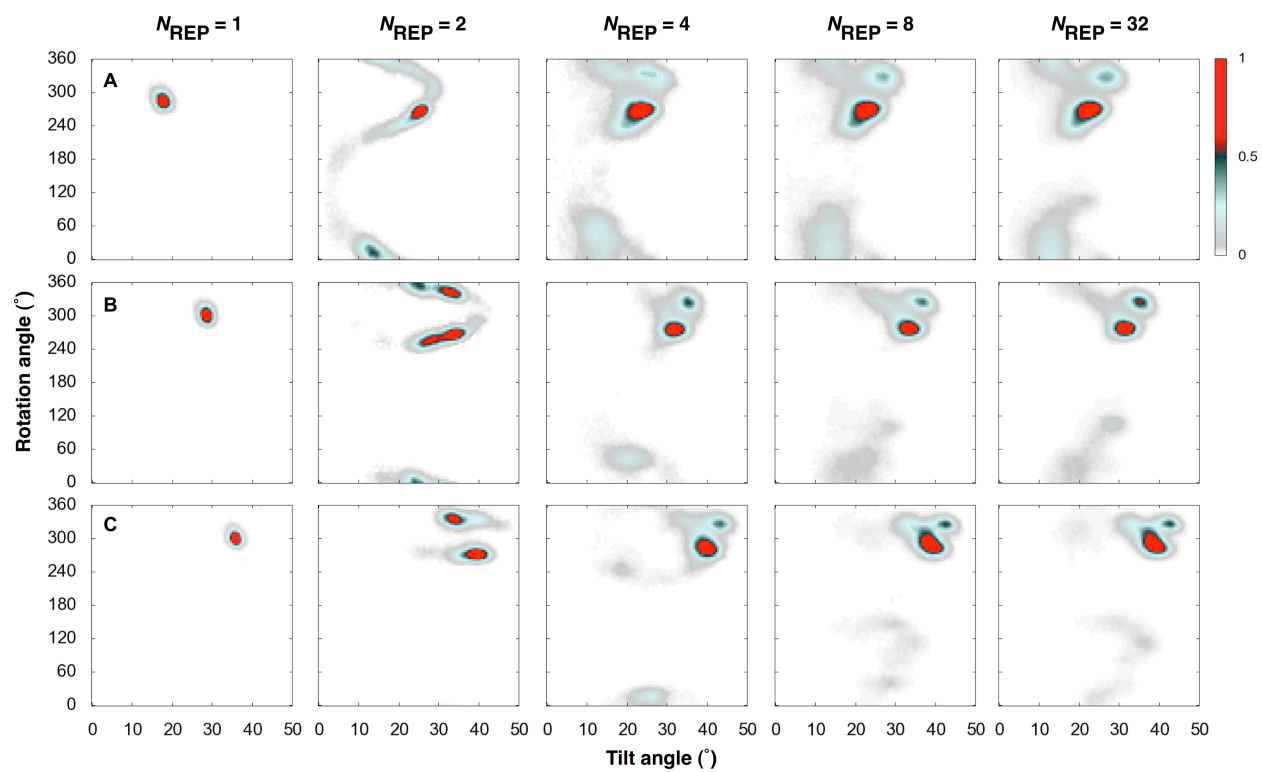

**Figure S2.** Orientational distributions of VpuTM structure ensembles in different bilayer environments: (A) DOPC, (B) DMPC, and (C) DLPC. Populations are normalized for easy comparison.

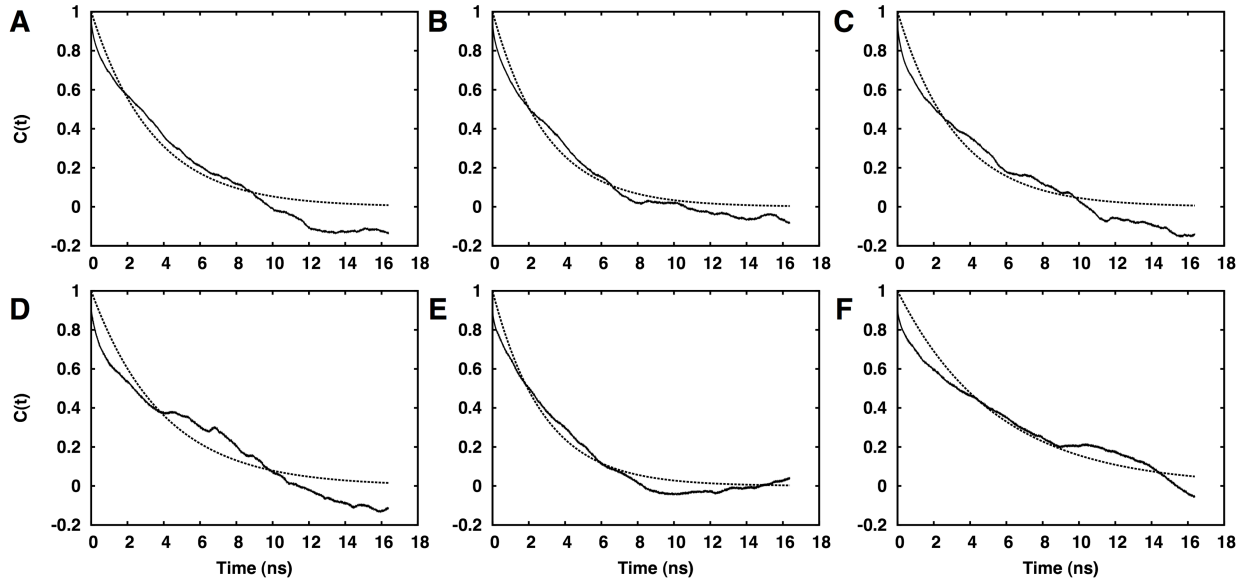

**Figure S3.** Correlation functions of VpuTM tilt and rotation in different bilayer environments. (A, B, and C) Tilt angles in DOPC, DMPC, and DLPC, respectively. (D, E, and F) Rotation angles in DOPC, DMPC, and DLPC, respectively. The solid line is the average correlation function over five independent simulation trajectories. The dotted line is a least-square fit to a single exponential decay,  $C(t) \approx e^{-t/\omega}$ . The tilt relaxation times ( $\omega$ ) are  $3.4 \pm 0.8$  ns (DOPC),  $3.0 \pm 0.8$  ns (DMPC), and  $3.3 \pm 0.5$  ns (DLPC). The rotation relaxation times ( $\omega$ ) are  $4.0 \pm 1.8$  ns (DOPC),  $2.8 \pm 0.4$  ns (DMPC), and  $5.4 \pm 1.3$  ns (DLPC).

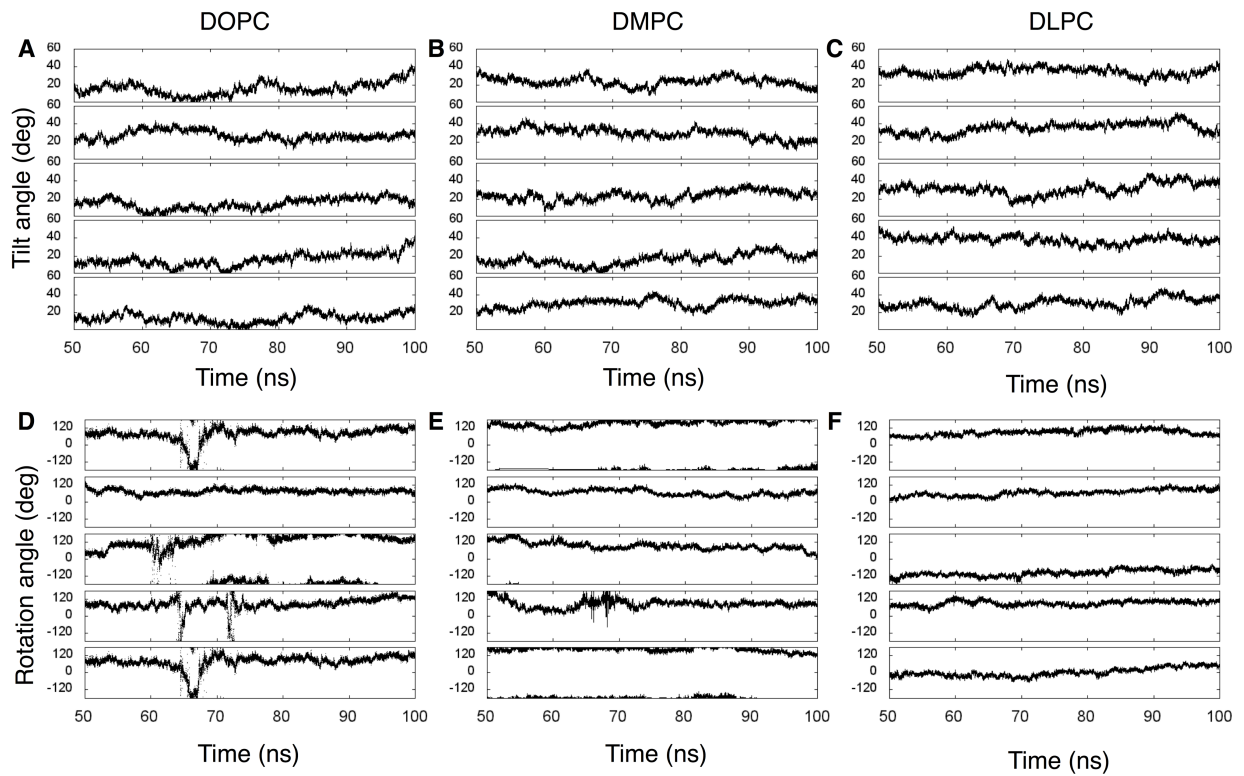

**Figure S4.** Time series of VpuTM tilt and rotation angles in different bilayer environments. (*A*, *B*, and *C*) Tilt angles in DOPC, DMPC, and DLPC, respectively. (*D*, *E*, and *F*) Rotation angles in DOPC, DMPC, and DLPC, respectively. Note that, by definition, the rotation angle is not well defined when the tilt angle is very small.
